# Supplementary material for: Appraisal of novel azomethine–thioxoimidazolidinone conjugates as ecto-5′-nucleotidase inhibitors: synthesis and molecular docking studies
Source: Royal Society of Chemistry journal article supplement (doi:10.1039/d2ra02675a), 2022-01-01
Supplement: d2ra02675a1.pdf [file d2ra02675a1.pdf]

## Supporting Information

### Appraisal of Novel Azomethine-Thioxoimidazolidinone conjugates as ecto-5'- nucleotidase inhibitors: Synthesis and Molecular Docking Studies

Pervaiz Ali Channar<sup>a,b†</sup>, Sehrish Bano<sup>c†</sup>, Sidra Hassan<sup>c</sup>, Fouzia Perveen<sup>d</sup>, Aamer Saeed<sup>a\*</sup>, Parvez Ali Mahesar<sup>e</sup>, Imtiaz Ali Khan<sup>f</sup>, Jamshed Iqbal<sup>c\*</sup>

<sup>a</sup>Department of Chemistry, Quaid-I-Azam University, 45320, Islamabad, Pakistan

<sup>b</sup>Department of Basic sciences, Mathematics and Humanities, Dawood university of Engineering and Technology, Karachi74800, Pakistan

<sup>c</sup>Centre for Advanced Drug Research, COMSATS University Islamabad, Abbottabad Campus, Abbottabad-22060, Pakistan

<sup>d</sup>Research Center for Modeling and Simulations, National University of Sciences and Technology (NUST), Islamabad, Pakistan

<sup>e</sup>Institute of Chemistry, Shah Abdul Latif University, Khairpur, 66020, Pakistan

<sup>f</sup>Department of Entomology, Agricultural University, Peshawar 25130, Khyber Pakhtunkhwa, Pakistan.

† Both these authors contributed equally

#### \*Corresponding Authors:

Prof. Dr. Aamer Saeed; [aamersaeed@yahoo.com](mailto:aamersaeed@yahoo.com), [asaheed@qau.edu.pk](mailto:asaheed@qau.edu.pk)

Prof. Dr. Jamshed Iqbal; [drjamshed@cuiatd.edu.pk](mailto:drjamshed@cuiatd.edu.pk)

Supplementary

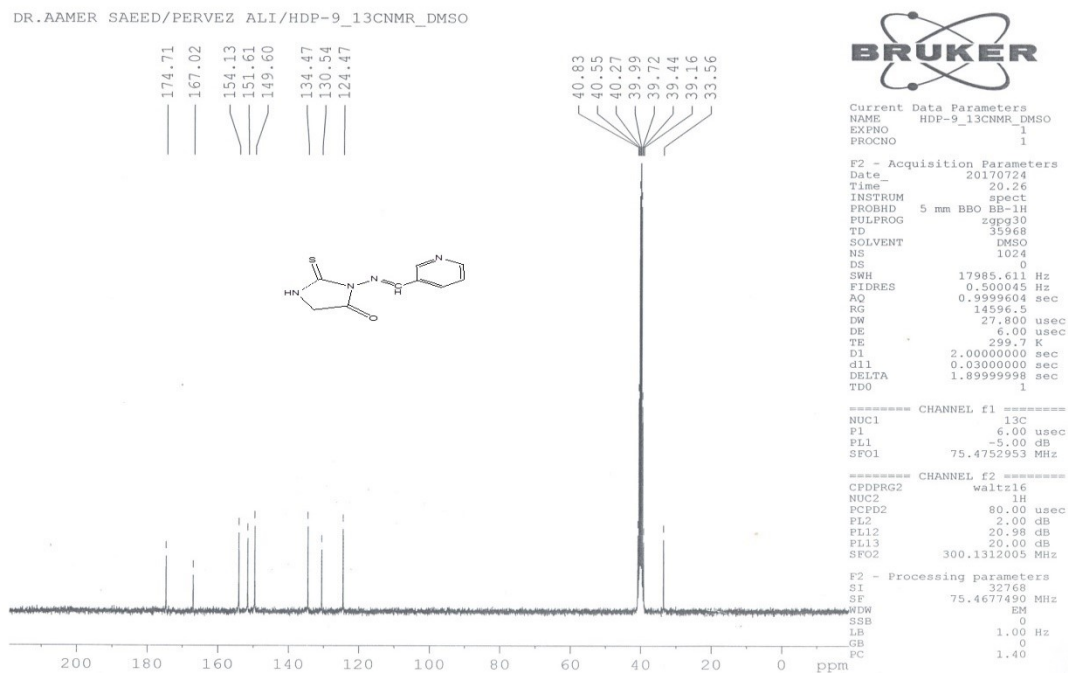

**(E)-3-((pyridin-3-ylmethylene)amino)-2-thioxoimidazolidin-4-one<sup>13</sup>CNMR (4h)**

DR. AAMER SAEED/PERVEZ ALI/HDP-9\_1HNMR\_DMSO

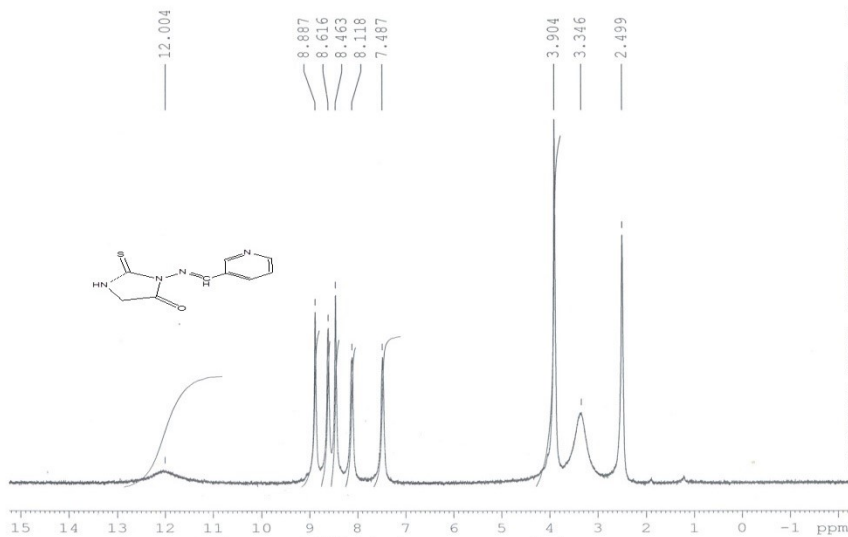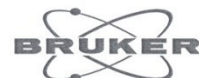

Current Data Parameters  
NAME HDP-9\_1HNMR\_DMSO  
EXPNO 1  
PROCNO 1

F2 - Acquisition Parameters  
Date\_ 20170724  
Time 21.09  
INSTRUM spect  
PROBHD 5 mm BBO BB-1H  
PULPROG zg30  
TD 65536  
SOLVENT DMSO  
NS 4  
DS 0  
SWH 6172.839 Hz  
FIDRES 0.094190 Hz  
AQ 5.3084560 sec  
RG 256  
DM 81.000 usec  
DE 6.00 usec  
TE 296.6 K  
D1 1.0000000 sec  
TDO 1

CHANNEL f1  
NUC1 1H  
P1 9.00 usec  
PL1 2.00 dB  
SFO1 300.1318534 MHz  
F2 - Processing parameters  
SI 32768  
SF 300.1297771 MHz  
WDW EM  
SSB 0  
LB 0.30 Hz  
GB 0  
PC 1.00

**(E)-3-((pyridin-3-ylmethylene) amino)-2-thioxoimidazolidin-4-one<sup>1</sup>HNMR (4h)**

DR. AAMER SAEED/PERVEZ ALI/HDP-2\_13CNMR\_DMSO

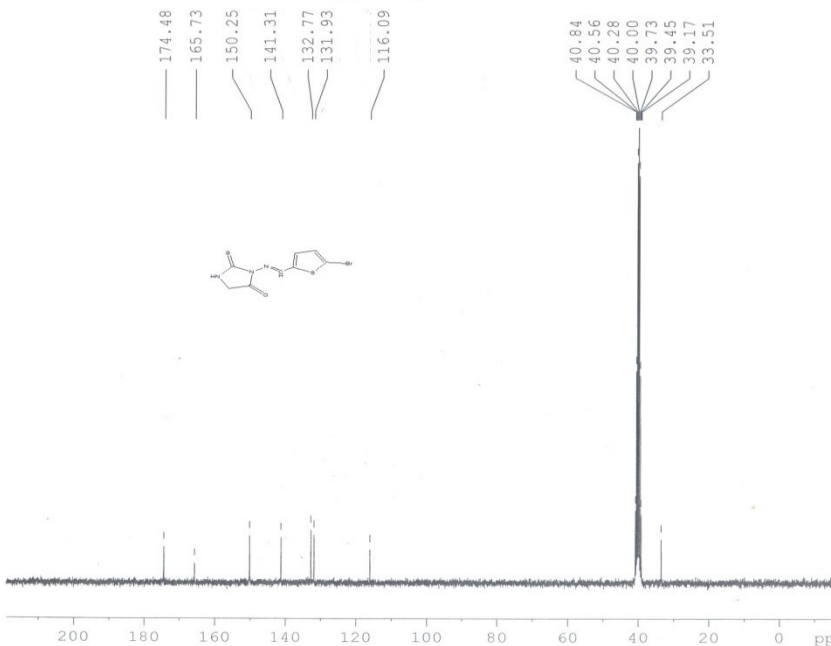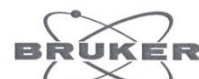

Current Data Parameters  
NAME HDP-2\_13CNMR\_DMSO  
EXPNO 1  
PROCNO 1

F2 - Acquisition Parameters  
Date\_ 20170724  
Time 19.31  
INSTRUM spect  
PROBHD 5 mm BBO BB-1H  
PULPROG zgpg30  
TD 35568  
SOLVENT DMSO  
NS 398  
DS 0  
SWH 17985.611 Hz  
FIDRES 0.500045 Hz  
AQ 0.9999604 sec  
RG 10321.3  
DM 27.800 usec  
DE 6.00 usec  
TE 300.8 K  
D1 2.0000000 sec  
d11 0.03000000 sec  
DELTA 1.89999998 sec  
TDO 1

CHANNEL f1  
NUC1 13C  
P1 6.00 usec  
PL1 -5.00 dB  
SFO1 75.4752953 MHz  
CHANNEL f2  
CPDPRG2 waltz16  
NUC2 1H  
PCPD2 80.00 usec  
PL2 2.00 dB  
PL12 20.98 dB  
PL13 20.00 dB  
SFO2 300.1312005 MHz

F2 - Processing parameters  
SI 32768  
SF 75.4677490 MHz  
WDW EM  
SSB 0  
LB 1.00 Hz  
GB 0  
PC 1.40

**(E)-3-(((5-bromothiophen-2-yl)methylene)amino)-2-thioxoimidazolidin-4-one<sup>1</sup>HNMR(4b)**

DR.AAMER SAEED/PERVEZ ALI/HDP-2\_1HNMR\_DMSO

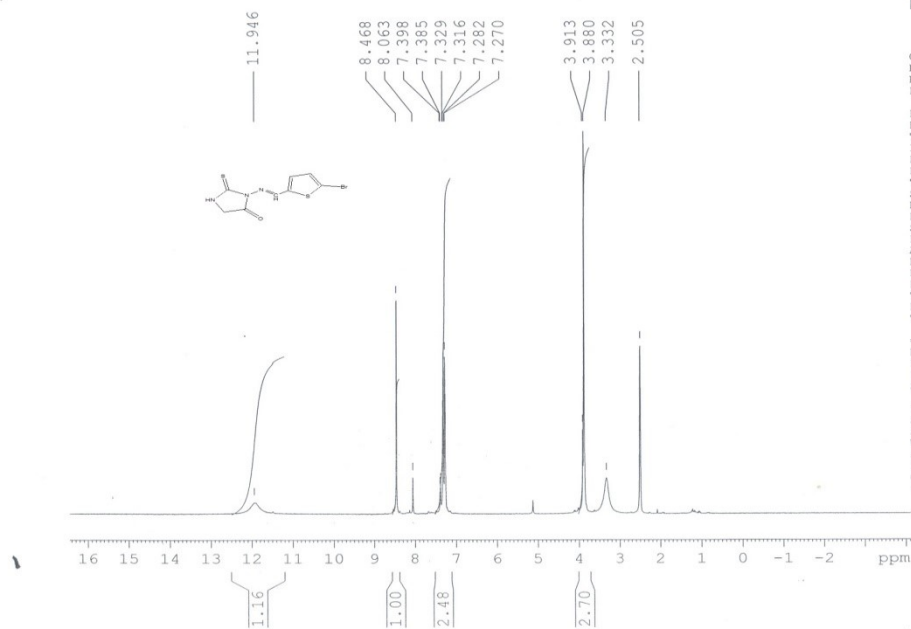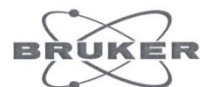

Current Data Parameters  
NAME HDP-2\_1HNMR\_DMSO  
EXPNO 1  
PROCNO 1

F2 - Acquisition Parameters  
Date 20170724  
Time 19.09  
INSTRUM spect  
PROBHD 5 mm BBO BB-1H  
PULPROG zg30  
TD 65536  
SOLVENT DMSO  
NS 8  
DS 0  
SWH 6172.839 Hz  
FIDRES 0.094190 Hz  
AQ 5.3084660 sec  
RG 456.1  
DW 81.000 usec  
DE 6.00 usec  
TE 299.9 K  
D1 1.0000000 sec  
TDO 1

----- CHANNEL f1 -----  
NUC1 1H  
P1 9.00 usec  
PL1 2.00 dB  
SF01 300.1318534 MHz

F2 - Processing parameters  
SI 32768  
SF 300.1300000 MHz  
WDW EM  
SSB 0  
LB 0.30 Hz  
GB 0  
PC 1.00

**(E)-3-(((5-bromothiophen-2-yl)methylene)amino)-2-thioxoimidazolidin-4-one<sup>13</sup>CNMR (4b)**

DR.AAMER SAEED/PERVEZ ALI/HDP5\_13CNMR\_DMSO

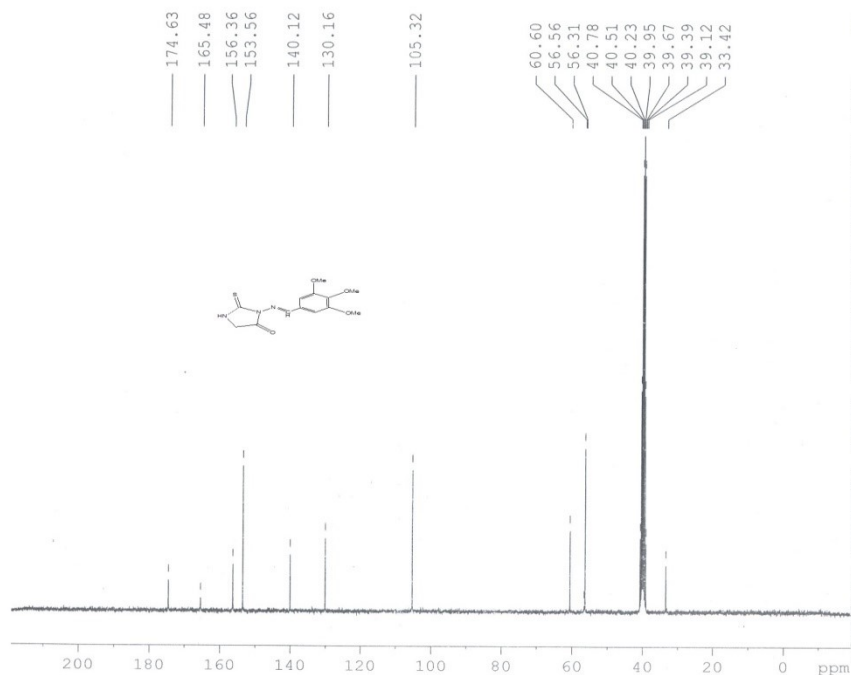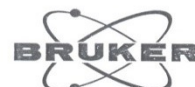

Current Data Parameters  
NAME HDP5\_13CNMR\_DMSO  
EXPNO 1  
PROCNO 1

F2 - Acquisition Parameters  
Date 20170801  
Time 19.06  
INSTRUM spect  
PROBHD 5 mm BBO BB-1H  
PULPROG zgpg30  
TD 35968  
SOLVENT DMSO  
NS 1024  
DS 0  
SWH 17985.611 Hz  
FIDRES 0.500045 Hz  
AQ 0.9999604 sec  
RG 11585.2  
DW 27.800 usec  
DE 6.00 usec  
TE 296.9 K  
D1 2.00000000 sec  
d11 0.03000000 sec  
DELTA 1.89999998 sec  
TDO 1

----- CHANNEL f1 -----  
NUC1 13C  
P1 6.00 usec  
PL1 -5.00 dB  
SF01 75.4752953 MHz

----- CHANNEL f2 -----  
CPDPRG2 waltz16  
NUC2 1H  
PCPD2 80.00 usec  
PL2 2.00 dB  
PL12 20.98 dB  
PL13 20.00 dB  
SF02 300.1312005 MHz

F2 - Processing parameters  
SI 32768  
SF 75.4677490 MHz  
WDW EM  
SSB 0  
LB 1.00 Hz  
GB 0  
PC 1.40

**(E)-2-thioxo-3-((3,4,5-trimethoxybenzylidene)amino)imidazolidin-4-one<sup>1</sup>HNMR (4e)**

DR.AAMER SAEED/PERVEZ ALI/HDP5\_1HNMR\_DMSO

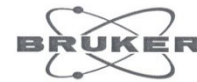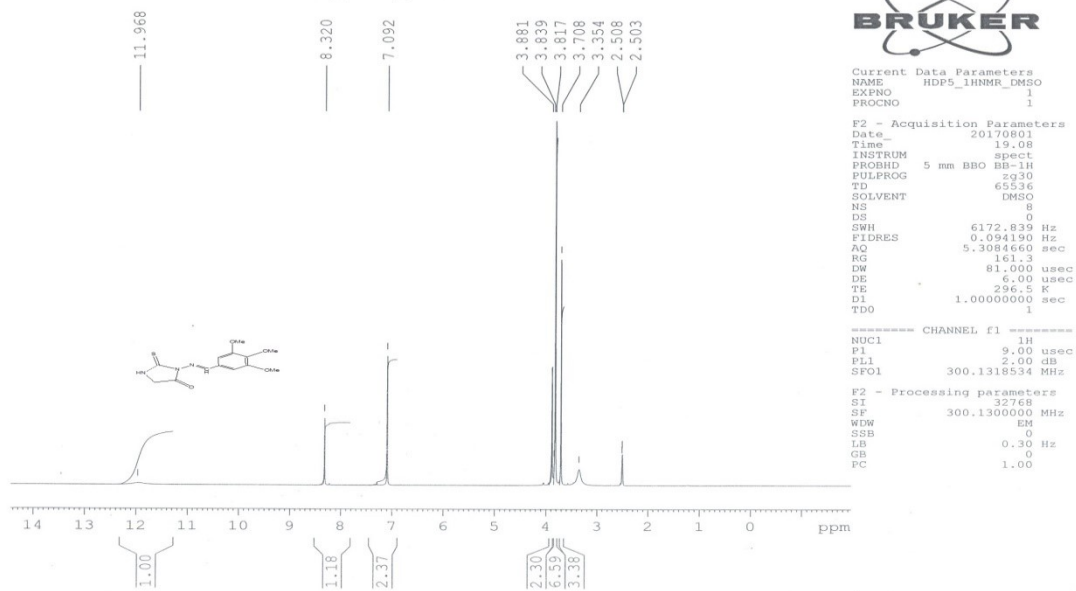

**(E)-2-thioxo-3-((3,4,5-trimethoxybenzylidene)amino)imidazolidin-4-one<sup>13</sup>CNMR (4e)**
